# Supplementary material for: Hormonal Regulation and Stimulation Response of Jatropha curcas L. Homolog Overexpression on Tobacco Leaf Growth by Transcriptome Analysis
Source: MDPI journal article supplement (doi:10.3390/ijms241713183), 2023-08-24
Supplement: s1 [file s1]

## 1 Supplementary Figures

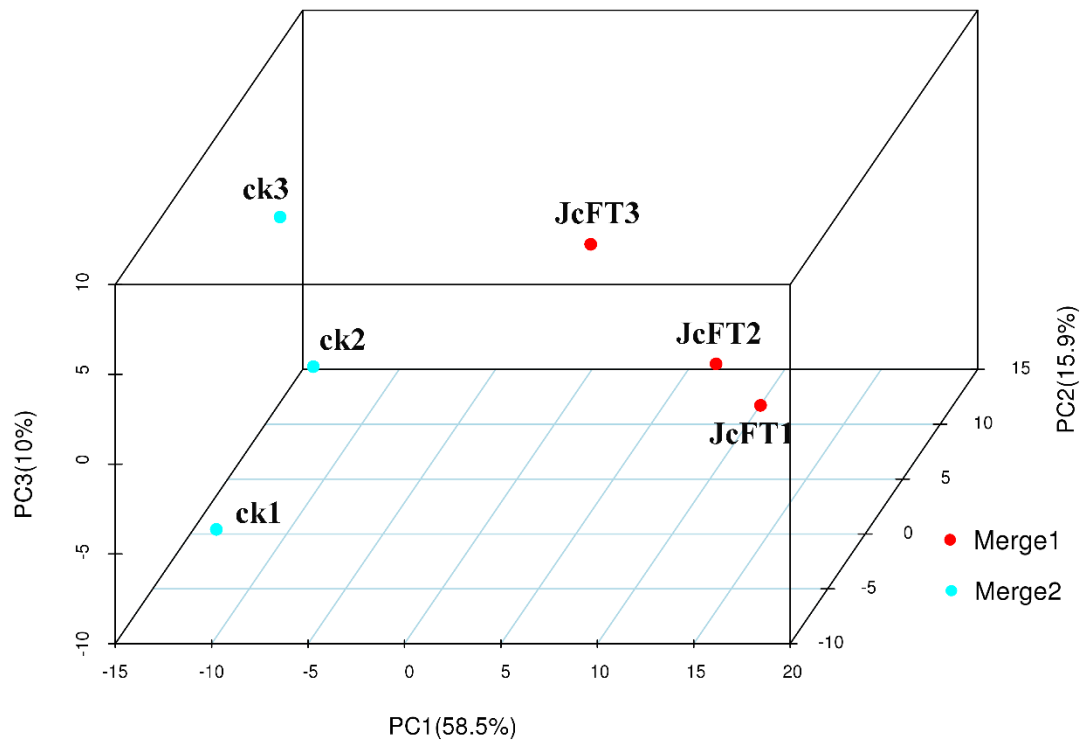

**Figure S1.** Principal component analysis (PCA) Plot of each sample's FPKM (PC1, PC2 and PC3 are three principal components; different colors represent different groups of biological replicates. FPKM, Fragments Per Kilobase of transcript per Million fragments mapped)

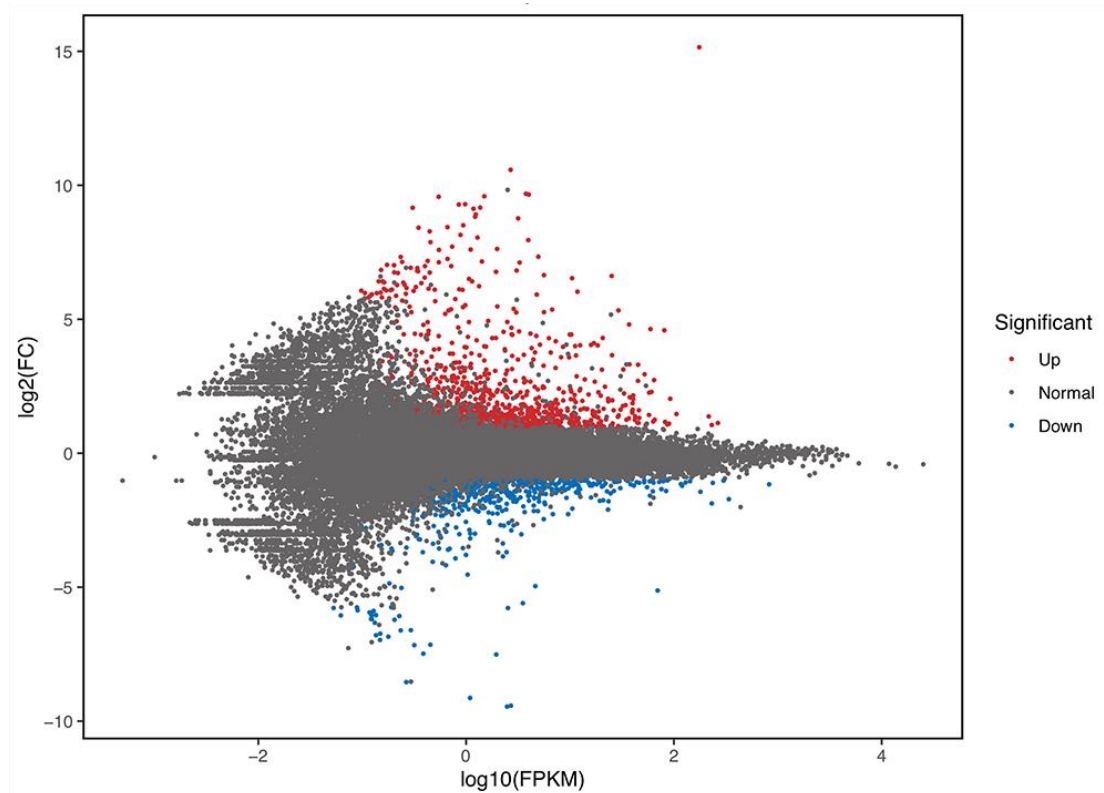

**Figure S2.** M-versus-A plot of differentially expressed genes between JcFT<sup>OE</sup> and control samples. (Each dot represents a gene. FPKM = (Number of reads mapped to a gene/Gene length) \*1000000/Total mapped reads, FC: Fold Change)

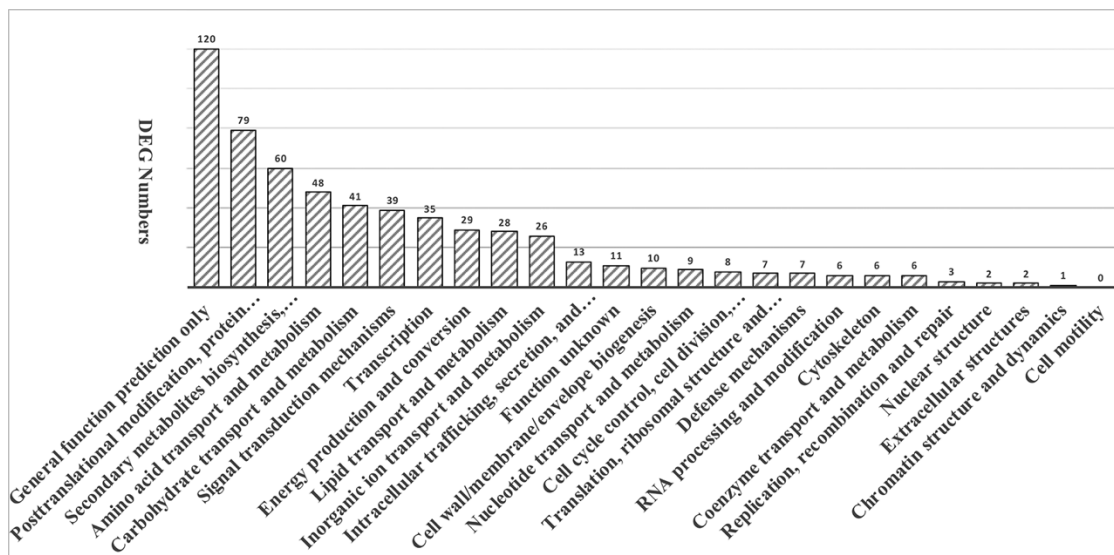

**Figure S3.** KOG (Eukaryotic Orthologous Groups classification) enrichment of differentially expressed genes

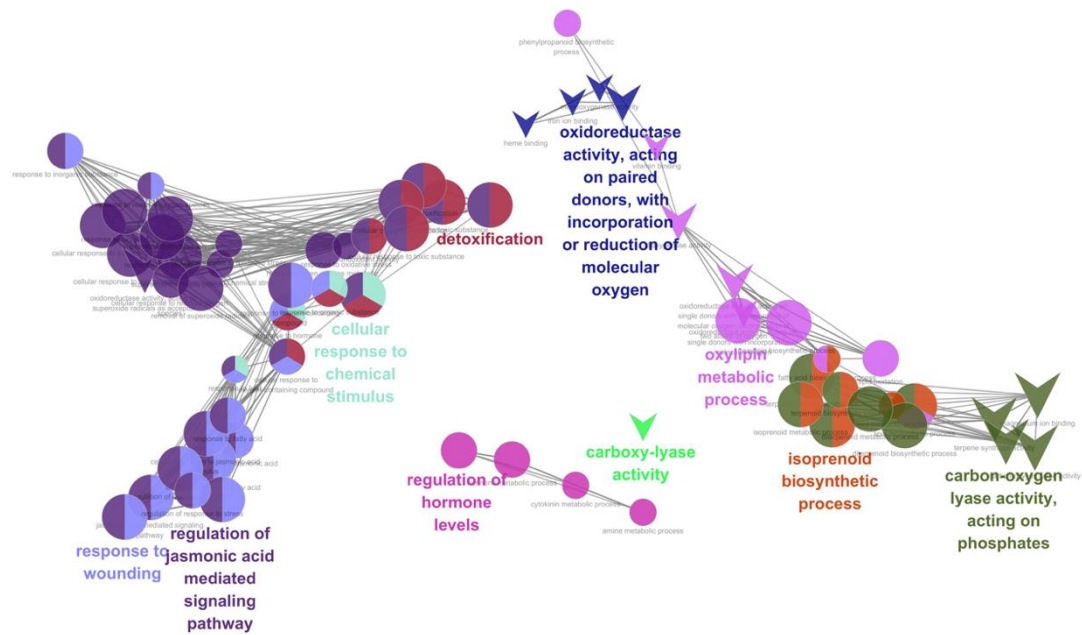

**Figure S4.** ClueGO grouping network of differentially expressed genes (Each circle represents biological process, and each V shape represents molecular function)

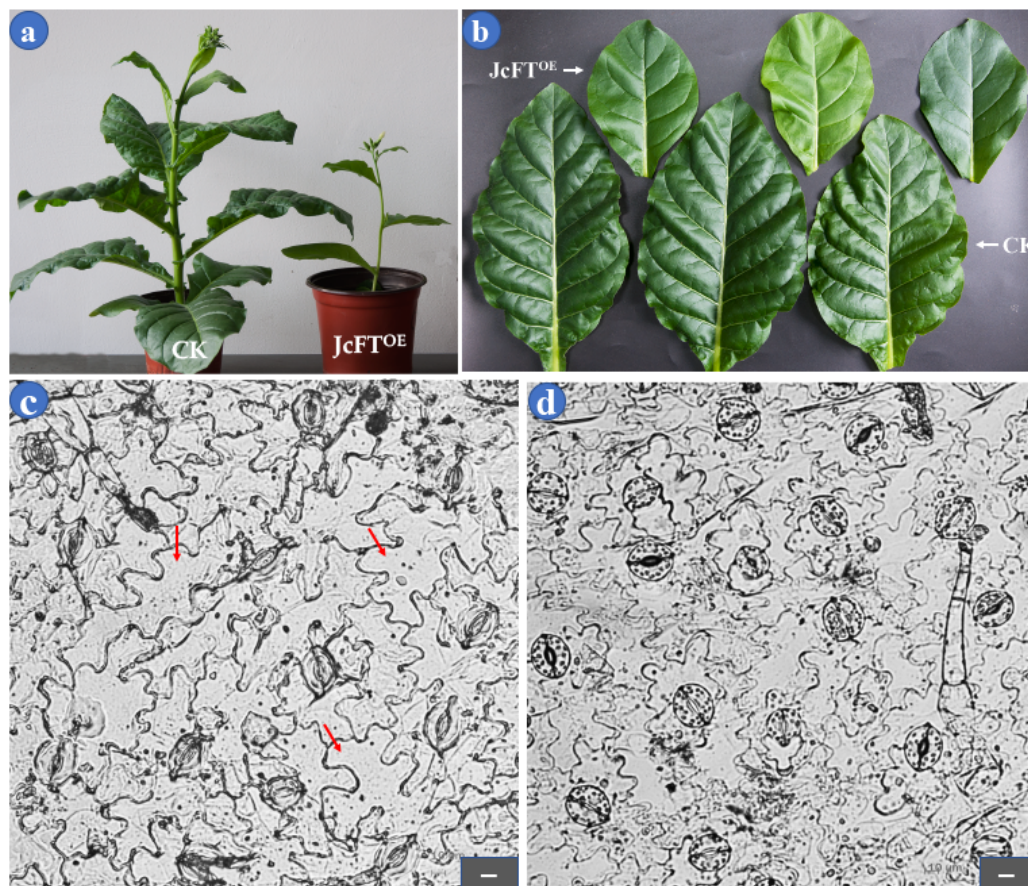

**Figure S5.** Comparison of leaf size and epidermal cells between JcFT<sup>OE</sup> tobacco and control. (a), (b) Show the size of JcFT<sup>OE</sup> tobacco and control leaves. (c) Epidermal cells of JcFT<sup>OE</sup> tobacco leaves, with arrows indicating larger cell than the control. (d) Epidermal cells of control tobacco leaves. c and d showing JcFT<sup>OE</sup> tobacco leaf cells were larger and fewer than the control under the same size field of view. Bar=10μm)

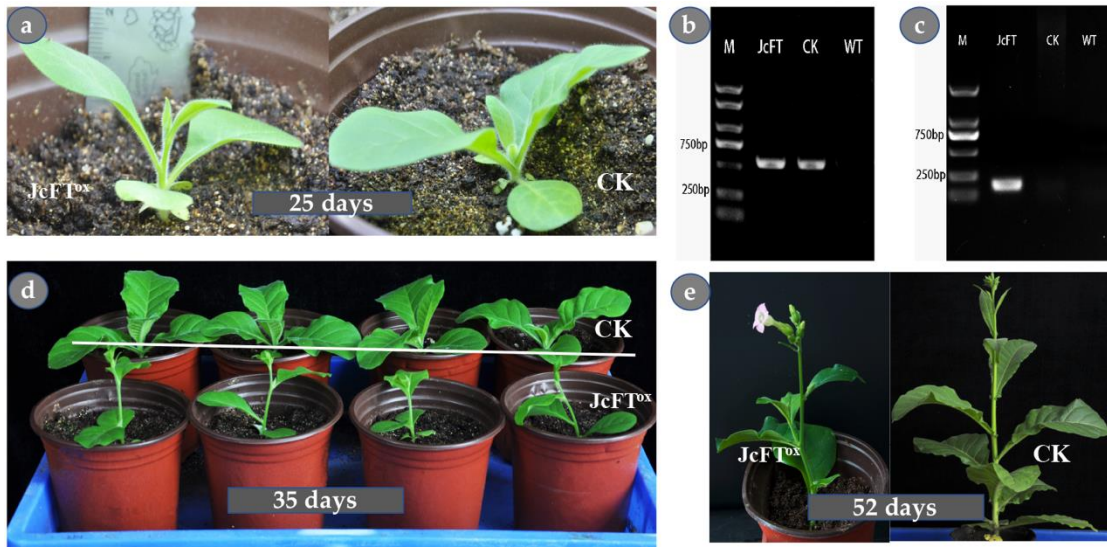

**Figure S6.** Characteristics and Identification of JcFT<sup>OE</sup> Transgenic Plants (a, Showing the traits of JcFT<sup>OE</sup> and control seedlings at 25 days after seeding; b, PCR amplification of *NPTII* using leaf DNA to identify transgenic tobacco; C, RT-PCR amplification of *JcFT* using leaf RNA to identify transgenic tobacco; d, Showing the traits of JcFT<sup>OE</sup> and control seedlings at 35 days after seeding; e, Showing the traits of JcFT<sup>OE</sup> and control seedlings at 52 days after seeding. CK, negative control, WT, wild-type tobacco)

## 2 Supplementary Tables

**Table S1.** The evaluation of the sequencing output data of each sample

| Samples | Total Reads | Mapped Reads        | Obtained Bases(bp) | Q20(%) | Q30(%) | GC(%) |
|---------|-------------|---------------------|--------------------|--------|--------|-------|
| CK1     | 42,335,870  | 39,937,707 (94.34%) | 6,331,125,978      | 98.10  | 94.48  | 44.22 |
| CK2     | 45,779,872  | 42,891,528 (93.69%) | 6,835,551,846      | 98.13  | 94.53  | 44.27 |
| CK3     | 41,733,080  | 39,232,507 (94.01%) | 6,235,570,420      | 98.09  | 94.32  | 44.54 |
| JcFT1   | 41,487,744  | 39,131,194 (94.32%) | 6,200,562,974      | 97.99  | 94.21  | 44.29 |
| JcFT2   | 49,212,278  | 46,432,861 (94.35%) | 7,348,262,136      | 98.16  | 94.59  | 44.19 |
| JcFT3   | 46,423,770  | 43,713,239 (94.16%) | 6,945,825,704      | 97.94  | 94.15  | 44.06 |

**Table S2.** Go terms included in each group identified by ClueGO

| Group name                                             | Go terms included                                                                                                                                                                                                                                                                                                                                                                      |
|--------------------------------------------------------|----------------------------------------------------------------------------------------------------------------------------------------------------------------------------------------------------------------------------------------------------------------------------------------------------------------------------------------------------------------------------------------|
| regulation of jasmonic acid mediated signaling pathway | GO:0098754,GO:0006979,GO:0009611,GO:0009636,GO:0010035,GO:0016721,GO:0070887,GO:0072593,GO:1901700,GO:0080134,GO:1990748,GO:0000302,GO:0006801,GO:0033993,GO:0062197,GO:0097237,GO:1901701,GO:0000305,GO:0031347,GO:0034599,GO:0070542,GO:0098869,GO:0009753,GO:0000303,GO:0016209,GO:0034614,GO:0071398,GO:0009867,GO:0071395,GO:0071450,GO:0019430,GO:2000022,GO:0071451,GO:0004784, |
| response to wounding                                   | GO:0009611,GO:0010033,GO:0010035,GO:1901700,GO:0009725,GO:0080134,GO:0000302,GO:0033993,GO:1901701,GO:0031347,GO:0070542,GO:0009753,GO:0071398,GO:0009867,GO:0071395,GO:2000022,                                                                                                                                                                                                       |

|                                                                                                      |                                                                                                                           |
|------------------------------------------------------------------------------------------------------|---------------------------------------------------------------------------------------------------------------------------|
| carbon-oxygen lyase activity, acting on phosphates                                                   | GO:0016835,GO:0008610,GO:0016838,GO:0006720,GO:0000287,GO:0008299,GO:0010333,GO:0006721,GO:0016114,GO:0016101,GO:0016102, |
| Detoxification                                                                                       | GO:0098754,GO:0009636,GO:0010033,GO:0070887,GO:0009725,GO:1990748,GO:0097237,GO:1901701,GO:0098869,GO:0016209,            |
| oxylipin metabolic                                                                                   | GO:0016701,GO:0019842,GO:0051213,GO:0008610,GO:0016702,GO:0009699,GO:0034440,GO:0031407,GO:0006633,GO:0031408,            |
| isoprenoid biosynthetic process                                                                      | GO:0006629,GO:0008610,GO:0006720,GO:0008299,GO:0006721,GO:0016114,GO:0006633,                                             |
| regulation of hormone levels                                                                         | GO:0010817,GO:0042445,GO:0009308,GO:0009690,                                                                              |
| oxidoreductase activity,acting on paired donors, with incorporation or reduction of molecular oxygen | GO:0004497,GO:0016705,GO:0020037,GO:0005506,                                                                              |
| cellular response to chemical stimulus                                                               | GO:0010033,GO:0070887,GO:0009725,GO:0033993,                                                                              |
| carboxy-lyase activity                                                                               | GO:0016831                                                                                                                |
| UDP-glycosyltransferase activity                                                                     | GO:0008194                                                                                                                |

**Table S3.** Statistics of the expression level of the DEGs (differentially expressed genes) involved in auxin and cytokinin metabolic processes

| Gene symbol  | CK1_count | CK2_count | CK3_count | JcFT1_count | JcFT2_count | JcFT3_count | FDR <sup>1</sup> | log2FC (JcFT / CK) | regulated |
|--------------|-----------|-----------|-----------|-------------|-------------|-------------|------------------|--------------------|-----------|
| LOC107826904 | 241       | 284       | 193       | 871         | 1433        | 928         | 7.51E-24         | 2.01636            | up        |
| LOC107764714 | 14        | 24        | 6         | 139         | 188         | 208         | 3.48E-17         | 3.45967            | up        |
| LOC107790150 | 253       | 288       | 256       | 131         | 173         | 133         | 8.27E-06         | -1.01701           | down      |
| LOC107790677 | 68        | 102       | 54        | 880         | 1239        | 1241        | 7.53E-79         | 3.75739358         | up        |
| LOC107791003 | 158       | 172       | 102       | 738         | 947         | 913         | 1.04E-38         | 2.43982938         | up        |
| LOC107800706 | 26        | 35        | 27        | 180         | 167         | 180         | 1.49E-14         | 2.44439094         | up        |
| LOC107769258 | 428       | 541       | 325       | 826         | 1282        | 1557        | 2.28E-09         | 1.34546629         | up        |
| LOC107794372 | 245       | 253       | 254       | 702         | 914         | 1056        | 4.67E-24         | 1.67078621         | up        |

FDR: false discovery rate; FC: fold change

**Table S4.** Statistics of the expression level of the DEGs (differentially expressed genes) involved in JAZs and MYC2s

| Gene symbol   | CK1_count | CK2_count | CK3_count | JcFT1_count | JcFT2_count | JcFT3_count | FDR <sup>1</sup> | log2FC (JcFT / CK) | regulated |
|---------------|-----------|-----------|-----------|-------------|-------------|-------------|------------------|--------------------|-----------|
| LOC107815661  | 16        | 21        | 24        | 110         | 139         | 109         | 7.57E-10         | 2.40263701         | up        |
| LOC107808301  | 308       | 336       | 210       | 1356        | 1465        | 1480        | 2.73E-40         | 2.19082378         | up        |
| LOC107801671  | 0         | 13        | 9         | 42          | 64          | 63          | 0.00049604       | 2.79963287         | up        |
| LOC107798038  | 260       | 297       | 249       | 651         | 751         | 616         | 1.76E-12         | 1.17955451         | up        |
| LOC107782755  | 172       | 215       | 120       | 420         | 424         | 463         | 2.08E-07         | 1.22946198         | up        |
| LOC107775241  | 376       | 356       | 260       | 1139        | 1744        | 1829        | 1.27E-30         | 2.08689432         | up        |
| LOC107774268  | 175       | 231       | 152       | 751         | 799         | 899         | 1.69E-30         | 1.99250006         | up        |
| LOC107767880  | 992       | 484       | 867       | 1928        | 2699        | 2927        | 0.00082649       | 1.51092957         | up        |
| LOC107767538  | 584       | 733       | 512       | 2313        | 3624        | 3834        | 9.75E-44         | 2.25999674         | up        |
| LOC107766083  | 958       | 994       | 826       | 5079        | 7301        | 8182        | 1.98E-85         | 2.72785972         | up        |
| LOC107765893  | 36        | 94        | 54        | 235         | 391         | 324         | 6.90E-12         | 2.22183845         | up        |
| LOC107763941  | 275       | 201       | 194       | 1862        | 2564        | 3060        | 1.02E-72         | 3.3167375          | up        |
| LOC107763851  | 334       | 420       | 236       | 1948        | 2145        | 1979        | 3.82E-48         | 2.47948458         | up        |
| LOC107761668  | 788       | 633       | 581       | 1257        | 1567        | 1884        | 3.55E-09         | 1.07389206         | up        |
| LOC107761032  | 55        | 47        | 57        | 104         | 207         | 260         | 1.51E-05         | 1.6658809          | up        |
| newGene_9590  | 56        | 110       | 80        | 232         | 191         | 240         | 7.45E-05         | 1.30156695         | up        |
| NewGene_11520 | 59        | 97        | 51        | 178         | 204         | 224         | 7.17E-06         | 1.41079654         | up        |

FDR: false discovery rate; FC: fold change

**Table S5.** The annotation of DEGs (differentially expressed genes) involved in the oxylipin metabolism

| Gene symbol  | FDR      | log2FC (JcFT / CK) | Regulated | KEGG_annotation                                                                                                                          | Pfam_annotation        | Swiss_Prot_annotation                                                                                |
|--------------|----------|--------------------|-----------|------------------------------------------------------------------------------------------------------------------------------------------|------------------------|------------------------------------------------------------------------------------------------------|
| LOC107813858 | 2.41E-05 | 3.64619475         | up        | K10529 0.0 nsy:104242207 K10529<br>alpha-dioxygenase [EC:1.14.99.-]  <br>(RefSeq) alpha-dioxygenase 1                                    | Animal haem peroxidase | Alpha-dioxygenase 1 OS=Arabidopsis<br>thaliana OX=3702 GN=DOX1 PE=1 SV=1                             |
| LOC107763642 | 6.40E-07 | 5.36046233         | up        | K00454 4.13e-80 nsy:104226762 K00454<br>lipoxygenase [EC:1.13.11.12]   (RefSeq)<br>linoleate 13S-lipoxygenase 2-1,<br>chloroplastic-like | Lipoxygenase           | Linoleate 13S-lipoxygenase 2-1,<br>chloroplastic OS=Solanum tuberosum<br>OX=4113 GN=LOX2.1 PE=1 SV=1 |
| LOC107800317 | 5.85E-09 | -1.3565446         | down      | K00454 0.0 nta:107800317 K00454<br>lipoxygenase [EC:1.13.11.12]   (RefSeq)<br>linoleate 13S-lipoxygenase 2-1,<br>chloroplastic-like      | Lipoxygenase           | Linoleate 13S-lipoxygenase 2-1,<br>chloroplastic OS=Solanum tuberosum<br>OX=4113 GN=LOX2.1 PE=1 SV=1 |

|              |            |            |    |                                                                                                                                             |              |                                                                                                      |
|--------------|------------|------------|----|---------------------------------------------------------------------------------------------------------------------------------------------|--------------|------------------------------------------------------------------------------------------------------|
| LOC107814671 | 2.43E-16   | 1.58194109 | up | K00454 0.0 nta:107814671 K00454<br>lipoxygenase [EC:1.13.11.12]   (RefSeq)<br>ACRE44; linoleate 13S-lipoxygenase 3-1,<br>chloroplastic-like | Lipoxygenase | Linoleate 13S-lipoxygenase 3-1,<br>chloroplastic OS=Solanum tuberosum<br>OX=4113 GN=LOX3.1 PE=1 SV=1 |
| LOC107771567 | 1.81E-65   | 2.37758103 | up | K00454 0.0 nta:107771567 K00454<br>lipoxygenase [EC:1.13.11.12]   (RefSeq)<br>linoleate 13S-lipoxygenase 3-1,<br>chloroplastic              | Lipoxygenase | Linoleate 13S-lipoxygenase 3-1,<br>chloroplastic OS=Solanum tuberosum<br>OX=4113 GN=LOX3.1 PE=1 SV=1 |
| LOC107760301 | 0.00125839 | 6.1038016  | up | K15718 0.0 nta:107760301 K15718<br>linoleate 9S-lipoxygenase [EC:1.13.11.58]<br>  (RefSeq) linoleate 9S-lipoxygenase 6                      | Lipoxygenase | Linoleate 9S-lipoxygenase 6 (Fragment)<br>OS=Solanum tuberosum OX=4113<br>GN=LOX1.6 PE=1 SV=1        |
| LOC107829038 | 7.15E-17   | 2.30044224 | up | K00454 0.0 nta:107829038 K00454<br>lipoxygenase [EC:1.13.11.12]   (RefSeq)<br>lipoxygenase 6, chloroplastic-like                            | Lipoxygenase | Lipoxygenase 6, chloroplastic<br>OS=Arabidopsis thaliana OX=3702<br>GN=LOX6 PE=2 SV=1                |
| LOC107806322 | 0.00044675 | 1.22975808 | up | K15718 0.0 nta:107806322 K15718<br>linoleate 9S-lipoxygenase [EC:1.13.11.58]<br>  (RefSeq) Lox1; probable linoleate 9S-<br>lipoxygenase 5   | Lipoxygenase | Probable linoleate 9S-lipoxygenase 5<br>OS=Solanum tuberosum OX=4113<br>GN=LOX1.5 PE=2 SV=1          |
| LOC107770253 | 1.67E-06   | 1.17909227 | up | K15718 0.0 nta:107770253 K15718<br>linoleate 9S-lipoxygenase [EC:1.13.11.58]<br>  (RefSeq) LOX; probable linoleate 9S-<br>lipoxygenase 5    | Lipoxygenase | Probable linoleate 9S-lipoxygenase 5<br>OS=Solanum tuberosum OX=4113<br>GN=LOX1.5 PE=2 SV=1          |

FDR: false discovery rate; FC: fold change

**Table S6.** The annotation of DEGs (differentially expressed genes) involved in the isoprenoid biosynthetic process

| Gene symbol  | FDR        | log2FC (JcFT / CK) | Regulated | KEGG_annotation                                                                                                                                                                                                          | Pfam_annotation                                  | Swiss_Prot_annotation                                                                                   |
|--------------|------------|--------------------|-----------|--------------------------------------------------------------------------------------------------------------------------------------------------------------------------------------------------------------------------|--------------------------------------------------|---------------------------------------------------------------------------------------------------------|
| LOC107798542 | 6.73E-71   | 5.26358189         | up        | K21925 7.10e-247 sot:102591915 K21925<br>(-)-camphene/tricyclene/(4S)-<br>limonene/myrcene synthase [EC:4.2.3.117<br>4.2.3.105 4.2.3.16 4.2.3.15]   (RefSeq) (-)-<br>camphene/tricyclene synthase,<br>chloroplastic      | Terpene synthase family,<br>metal binding domain | (R)-linalool synthase TPS5, chloroplastic<br>OS=Solanum lycopersicum OX=4081<br>GN=TPS5 PE=1 SV=1       |
| LOC107828918 | 2.65E-22   | 1.97269472         | up        | K21925 6.17e-195 sly:101245212 K21925<br>(-)-camphene/tricyclene/(4S)-<br>limonene/myrcene synthase [EC:4.2.3.117<br>4.2.3.105 4.2.3.16 4.2.3.15]   (RefSeq) TPS3;<br>(-)-camphene/tricyclene synthase,<br>chloroplastic | Terpene synthase family,<br>metal binding domain | (R)-linalool synthase TPS5, chloroplastic<br>OS=Solanum lycopersicum OX=4081<br>GN=TPS5 PE=1 SV=1       |
| LOC107798543 | 2.00E-33   | 2.45172483         | up        | K21925 2.49e-277 sly:101245212 K21925<br>(-)-camphene/tricyclene/(4S)-<br>limonene/myrcene synthase [EC:4.2.3.117<br>4.2.3.105 4.2.3.16 4.2.3.15]   (RefSeq) TPS3;<br>(-)-camphene/tricyclene synthase,<br>chloroplastic | Terpene synthase family,<br>metal binding domain | (-)-camphene/tricyclene synthase,<br>chloroplastic OS=Solanum lycopersicum<br>OX=4081 GN=TPS3 PE=1 SV=1 |
| LOC107769393 | 0.00092823 | 6.83809736         | up        | K18117 0.0 sot:102577550 K18117<br>viridiflorene synthase [EC:4.2.3.88]  <br>(RefSeq) PVS3, VS1; putative<br>vetispiradiene synthase 5                                                                                   | Terpene synthase family,<br>metal binding domain | Viridiflorene synthase OS=Solanum<br>lycopersicum OX=4081 GN=TPS32 PE=1<br>SV=1                         |

|              |            |            |      |                                                                                                                                                       |                                                  |                                                                                              |
|--------------|------------|------------|------|-------------------------------------------------------------------------------------------------------------------------------------------------------|--------------------------------------------------|----------------------------------------------------------------------------------------------|
| LOC107816174 | 6.55E-12   | 3.36800565 | up   | K18108 5.50e-224 vvi:100232956 K18108<br>(-)-alpha-terpineol synthase [EC:4.2.3.111]<br>  (RefSeq) (-)-a-terpineol synthase                           | Terpene synthase family,<br>metal binding domain | (-)-alpha-terpineol synthase OS=Vitis<br>vinifera OX=29760 PE=1 SV=1                         |
| LOC107831250 | 7.13E-05   | 7.32525089 | up   | K18108 3.72e-233 vvi:100232956 K18108<br>(-)-alpha-terpineol synthase [EC:4.2.3.111]<br>  (RefSeq) (-)-a-terpineol synthase                           | Terpene synthase family,<br>metal binding domain | (-)-alpha-terpineol synthase OS=Vitis<br>vinifera OX=29760 PE=1 SV=1                         |
| LOC107770515 | 0.00118156 | 1.41226714 | up   | K15813 0.0 nta:107770515 K15813 beta-<br>amyrin synthase [EC:5.4.99.39]   (RefSeq)<br>beta-amyrin synthase-like                                       | Squalene-hopene cyclase<br>C-terminal domain     | Beta-amyrin synthase OS=Solanum<br>lycopersicum OX=4081 GN=TTS1 PE=1<br>SV=1                 |
| LOC107819330 | 2.23E-14   | 2.73767268 | up   | K15803 0.0 nta:107819330 K15803 (-)-<br>germacrene D synthase [EC:4.2.3.75]  <br>(RefSeq) probable terpene synthase 3                                 | Terpene synthase family,<br>metal binding domain | (-)-germacrene D synthase OS=Vitis<br>vinifera OX=29760<br>GN=VIT_19s0014g04930 PE=1 SV=1    |
| LOC107799408 | 0.00602982 | -2.4618371 | down | K15803 0.0 nau:109241781 K15803 (-)-<br>germacrene D synthase [EC:4.2.3.75]  <br>(RefSeq) 5-epi-aristolochene synthase 3                              | Terpene synthase family,<br>metal binding domain | 5-epi-aristolochene synthase 3<br>OS=Nicotiana attenuata OX=49451 PE=1<br>SV=1               |
| LOC107789701 | 7.23E-05   | 4.29166814 | up   | K15746 1.87e-221 nta:107789701 K15746<br>beta-carotene 3-hydroxylase<br>[EC:1.14.15.24]   (RefSeq) beta-carotene<br>hydroxylase 2, chloroplastic-like | Fatty acid hydroxylase<br>superfamily            | Beta-carotene hydroxylase 2,<br>chloroplastic OS=Capsicum annuum<br>OX=4072 GN=CA2 PE=1 SV=2 |
| LOC107800233 | 0.00211646 | 6.2319132  | up   | K14173 0.0 nta:107800233 K14173 alpha-<br>farnesene synthase [EC:4.2.3.46]  <br>(RefSeq) alpha-farnesene synthase-like                                | Terpene synthase family,<br>metal binding domain | Alpha-farnesene synthase OS=Ricinus<br>communis OX=3988 GN=TPS7 PE=1<br>SV=2                 |
| LOC107779472 | 1.67E-06   | 4.29907445 | up   | K14173 0.0 nta:107779472 K14173 alpha-<br>farnesene synthase [EC:4.2.3.46]  <br>(RefSeq) alpha-farnesene synthase-like                                | Terpene synthase family,<br>metal binding domain | Alpha-farnesene synthase OS=Ricinus<br>communis OX=3988 GN=TPS7 PE=1<br>SV=2                 |

|              |            |            |      |                                                                                                                                                                                                                                   |                                                             |                                                                                                                                            |
|--------------|------------|------------|------|-----------------------------------------------------------------------------------------------------------------------------------------------------------------------------------------------------------------------------------|-------------------------------------------------------------|--------------------------------------------------------------------------------------------------------------------------------------------|
| LOC107779444 | 0.00211583 | 4.4385794  | up   | K13789 1.74e-227 nta:107779444 K13789<br>geranylgeranyl diphosphate synthase,<br>type II [EC:2.5.1.1 2.5.1.10 2.5.1.29]  <br>(RefSeq) heterodimeric geranylgeranyl<br>pyrophosphate synthase small subunit,<br>chloroplastic-like | Polyprenyl synthetase                                       | Heterodimeric geranylgeranyl<br>pyrophosphate synthase small subunit,<br>chloroplastic OS=Arabidopsis thaliana<br>OX=3702 GN=GGR PE=1 SV=2 |
| LOC107796407 | 0.0038812  | -1.1505524 | down | K01641 0.0 nto:104107138 K01641<br>hydroxymethylglutaryl-CoA synthase<br>[EC:2.3.3.10]   (RefSeq)<br>hydroxymethylglutaryl-CoA synthase-<br>like                                                                                  | Hydroxymethylglutaryl-<br>coenzyme A synthase C<br>terminal | Hydroxymethylglutaryl-CoA synthase<br>OS=Arabidopsis thaliana OX=3702<br>GN=HMGS PE=1 SV=2                                                 |
| LOC107766711 | 8.06E-05   | 2.29808433 | up   | K00869 2.45e-289 nta:107766711 K00869<br>mevalonate kinase [EC:2.7.1.36]  <br>(RefSeq) mevalonate kinase-like                                                                                                                     | GHMP kinases N terminal<br>domain                           | Mevalonate kinase OS=Arabidopsis<br>thaliana OX=3702 GN=At5g27450 PE=2<br>SV=1                                                             |
| LOC107772124 | 0.00685795 | -1.3880326 | down | K00021 0.0 nta:107772124 K00021<br>hydroxymethylglutaryl-CoA reductase<br>(NADPH) [EC:1.1.1.34]   (RefSeq) 3-<br>hydroxy-3-methylglutaryl-coenzyme A<br>reductase 1                                                               | Hydroxymethylglutaryl-<br>coenzyme A reductase              | 3-hydroxy-3-methylglutaryl-coenzyme<br>A reductase 1 OS=Solanum tuberosum<br>OX=4113 GN=HMG1 PE=2 SV=1                                     |
| LOC107770799 | 0.00244814 | -1.1359608 | down | --                                                                                                                                                                                                                                | --                                                          | --                                                                                                                                         |
| LOC107772411 | 1.41E-06   | -1.3298255 | down | --                                                                                                                                                                                                                                | --                                                          | --                                                                                                                                         |

FDR: false discovery rate; FC: fold change

**Table S7.** DEGs (differentially expressed genes) related to the jasmonic acid reaction

| Gene symbol   | CK1_count | CK2_count | CK3_count | JcFT1_count | JcFT2_count | JcFT3_count | FDR       | log2FC (JcFT / CK) | Regulated |
|---------------|-----------|-----------|-----------|-------------|-------------|-------------|-----------|--------------------|-----------|
| LOC107798243  | 91        | 68        | 84        | 169         | 233         | 248         | 1.67E-05  | 1.2552126          | up        |
| LOC107767538  | 584       | 733       | 512       | 2313        | 3624        | 3834        | 9.75E-44  | 2.25999674         | up        |
| LOC107766083  | 958       | 994       | 826       | 5079        | 7301        | 8182        | 1.98E-85  | 2.72785972         | up        |
| LOC107761032  | 55        | 47        | 57        | 104         | 207         | 260         | 1.51E-05  | 1.6658809          | up        |
| LOC107808301  | 308       | 336       | 210       | 1356        | 1465        | 1480        | 2.73E-40  | 2.19082378         | up        |
| LOC107798038  | 260       | 297       | 249       | 651         | 751         | 616         | 1.76E-12  | 1.17955451         | up        |
| LOC107763851  | 334       | 420       | 236       | 1948        | 2145        | 1979        | 3.82E-48  | 2.47948458         | up        |
| LOC107815661  | 16        | 21        | 24        | 110         | 139         | 109         | 7.57E-10  | 2.40263701         | up        |
| LOC107801671  | 0         | 13        | 9         | 42          | 64          | 63          | 0.0004960 | 2.79963287         | up        |
| LOC107767880  | 992       | 484       | 867       | 1928        | 2699        | 2927        | 0.0008264 | 1.51092957         | up        |
| LOC107763941  | 275       | 201       | 194       | 1862        | 2564        | 3060        | 1.02E-72  | 3.3167375          | up        |
| newGene_32933 | 7674      | 8186      | 8798      | 25778       | 32989       | 17048       | 0.002213  | 1.84449            | up        |

FDR: false discovery rate; FC: fold change

**Table S8.** The primers for PCR, RT-PCR and RT-qPCR

|                                              | Accession<br>number/Gene<br>symbol | Forward Primer (FP)     | Reverse Primer (RP)      | Length<br>of PCR<br>product<br>(bp) | FP<br>TM<br>(°C) | RP<br>TM<br>(°C) | FP<br>GC% | RP<br>GC% |
|----------------------------------------------|------------------------------------|-------------------------|--------------------------|-------------------------------------|------------------|------------------|-----------|-----------|
| <i>NPTII</i>                                 | X57709                             | GGAGAGGCTATTCGGCTATGAC  | CACCATGATATCGGCAAGCAG    | 547                                 | 59               | 58               | 55        | 50        |
| <i>JcFT</i>                                  | NM_001308752                       | CTAGCCCAAGTGACCCTAATCTC | GGGCTCTCATAGCACACTATCTC  | 109                                 | 58               | 58               | 52        | 52        |
| <i>EF-1a</i>                                 | AF120093                           | TGAGATGCACCACGAAGCTC    | CCAACATTGTCACCAGGAAGTG   | 51                                  | 59               | 59               | 55        | 50        |
| <i>L25</i>                                   | L18908                             | CCCCTCACCACAGAGTCTGC    | AAGGGTGTGTTGTCCTCAATCTT  | 51                                  | 62               | 59               | 65        | 42        |
| DEGs of<br>cytokinin<br>metabolic<br>process | LOC107790677                       | CGCATGTACAGTCTATTTTGAG  | TAACCCAAGCGGAACCATGC     | 179                                 | 58.11            | 60.96            | 43.48     | 55        |
|                                              | LOC107791003                       | AGTGACACCAGAGGAGGAGG    | ATGCCGACCTCAGAAATCCC     | 53                                  | 60.25            | 59.82            | 60        | 55        |
|                                              | LOC107800706                       | AGAGCATCAGGCGTTCAACA    | TGTGTGCACTGTGGAGCATT     | 104                                 | 59.96            | 60.47            | 50        | 50        |
|                                              | LOC107769258                       | GGGCCCCTTTGTCAATTGTT    | GAAGCCAACTAAAGACTGGGGA   | 137                                 | 58.94            | 59.96            | 50        | 50        |
|                                              | LOC107794372                       | CCACGAACGAGTTGCTTCCA    | TTTCACCGCGCCATTTCTTG     | 81                                  | 60.88            | 60.04            | 55        | 50        |
| DEGs of<br>auxin<br>metabolic<br>process     | LOC107826904                       | GTGCTATGTGGATGGCTAACTC  | AAGCACTCATCTTCGCCGTG     | 199                                 | 58.87            | 61.02            | 50        | 55        |
|                                              | LOC107764714                       | AACAATACGCAGAAGTTTTCCCT | CAAGCACTCATCATCGCCG      | 135                                 | 59.42            | 59.36            | 37.5      | 57.89     |
|                                              | LOC107790150                       | TGGGAGCGACAAATCCAAGG    | GCACCCGAGTTAGGGATTCA     | 143                                 | 60.32            | 59.46            | 55        | 55        |
| DEGs of JAZ                                  | LOC107815661                       | TACTACTGGTAGACGGGGAGC   | CCACCCGTGACTTCGTGAT      | 72                                  | 60.13            | 59.71            | 57.14     | 57.89     |
|                                              | LOC107808301                       | GGAAAGATAGGGCAACGGCT    | TCGCCAACCAAAAAGGTTTCAT   | 180                                 | 60.11            | 58.96            | 55        | 42.86     |
|                                              | LOC107801671                       | TTTGTTTATTAGTTGCTACCGGA | GTGACCTTGCCGGAATCTACA    | 70                                  | 59               | 60.07            | 36.00     | 52.38     |
|                                              | LOC107798038                       | TGGTTGGAATTGGGTGCTCA    | TGAATAACCATCTCTCTGGTTTCA | 223                                 | 59.81            | 57.63            | 50.00     | 37.50     |

|                                          |              |                         |                          |     |       |       |       |       |
|------------------------------------------|--------------|-------------------------|--------------------------|-----|-------|-------|-------|-------|
|                                          | LOC107775241 | GACCTGTTGGGGCGACTAC     | TGCAGCGTTCATCACCTT       | 107 | 60.08 | 59.93 | 63.16 | 52.63 |
|                                          | LOC107767880 | ATGGACCTCAACACCAGACC    | AATGGCCACTTCATCCCAGA     | 74  | 59.31 | 59    | 55.00 | 50.00 |
|                                          | LOC107767538 | TCTTCTACGGTGGGACGGT     | TGGTTCACACAAGTGCCGT      | 172 | 59.92 | 60.08 | 57.89 | 52.63 |
|                                          | LOC107766083 | AGAAATCGGGTGAGTGCTCC    | TGGTTTATGGCAATAGGCTGC    | 137 | 59.75 | 58.97 | 55.00 | 47.62 |
|                                          | LOC107763941 | ATGCTAAAGGAGCACTGGCT    | TCCAAAAATCGGGCAAGGGT     | 55  | 59.38 | 60.18 | 50.00 | 50.00 |
|                                          | LOC107763851 | CACATCTGCTGCTGCCACT     | CTGGTGCTGTACTTGCGGT      | 175 | 60.67 | 60.3  | 57.89 | 57.89 |
|                                          | LOC107761032 | TTGCTTCCGCCCTCATT       | GGGATAAACAACATCACCTCTGTC | 124 | 59.92 | 59.36 | 52.63 | 45.83 |
| DEGs of<br>AUX/IAA,<br>SAUR, GH3,<br>ARG | LOC107806659 | AACAAGACTCAGCCCCAGC     | AGGTGCTCCATCCATGCTAAC    | 146 | 59.93 | 60.13 | 57.89 | 52.38 |
|                                          | LOC107764405 | GGTGGCGGTGGAGAATTAAGA   | GGCTTGGCTGAGTCCTTGTT     | 185 | 60.07 | 60.54 | 52.38 | 55    |
|                                          | LOC107830653 | CGTGGGAGATGTACCTTGGC    | CAACATTTTCAGCTCCTGCTCT   | 129 | 60.46 | 59.18 | 60.00 | 45.45 |
|                                          | LOC107813771 | TCCCTGTAGCGTGGATGTCT    | GTCTACCTAGTCAGAGGGTGGT   | 199 | 60.32 | 60.03 | 55.00 | 54.55 |
|                                          | LOC107783912 | ATGGGTGGTCTCACAATTCCA   | TTTCTTCCTCGCCTGAACTGTA   | 159 | 59.29 | 59.37 | 47.62 | 45.45 |
|                                          | LOC107782902 | CTGAGTTGCCATTTGGCCTAT   | GAGGCATACGAATAGCCATGA    | 172 | 58.62 | 57.68 | 47.62 | 47.62 |
|                                          | LOC107763329 | CCCCACAGCACTCAGCAAAA    | GGCATACGGATAGCCATAGTCG   | 137 | 61.11 | 60.48 | 55.00 | 54.55 |
|                                          | LOC107832378 | CCTACACACTCCACATGCCTT   | GAGGGAGTATTTATGGAGGGAGAC | 55  | 60    | 59.47 | 52.38 | 50    |
|                                          | LOC107794774 | GCCAGTTCCCTTATCTCAAGTCA | GAGTCTAGGGGTCTTCCCGT     | 133 | 60.06 | 60.03 | 47.83 | 60.00 |
|                                          | LOC107795884 | GCGCACCTACTGTGCATGA     | GTGACGCCCTGCTTATGTGT     | 130 | 60.74 | 60.67 | 57.89 | 55.00 |
| DEGs involved in<br>oxylipin             | LOC107771982 | TTGGGGTATGCTAAAGTGCGT   | AAGGGCTGCTAACAACAAAGC    | 70  | 60    | 59.66 | 47.62 | 47.62 |
|                                          | LOC107813858 | ACTTTCGCGTTCCCTCCACAG   | GGCTGACCACCCAATCGTT      | 299 | 60.6  | 60.3  | 55    | 57.89 |
|                                          | LOC107763642 | AAGCGAGAAAGGTACTCCCG    | TAGCATCTGGACAACACGAC     | 181 | 59.47 | 57.64 | 55    | 50    |
|                                          | LOC107814671 | GCACCAAAATGAAAACCCAC    | AGTACGGTTGCTCTCACCTT     | 73  | 58.78 | 58.66 | 47.62 | 50    |
|                                          | LOC107771567 | CCTCCGAAATGCAGAGTGGT    | ATCTACGCATGAGAGGTGGC     | 164 | 60.04 | 59.61 | 55    | 55    |

|                                                  |              |                            |                         |     |       |       |       |       |
|--------------------------------------------------|--------------|----------------------------|-------------------------|-----|-------|-------|-------|-------|
| metabolic process                                | LOC107760301 | AACGTGGAACATAGATTTGGCT     | CGGCGCTAAATAAGGGAGAGT   | 163 | 58.31 | 59.93 | 40.91 | 52.38 |
|                                                  | LOC107829038 | CGAGGACATTGCCAGCACTA       | AAACCGGGCTACCGATGATG    | 58  | 60.11 | 60.18 | 55    | 55    |
|                                                  | LOC107806322 | TTTCCTAGTTAGAACTTCACAACACA | CCCTCCGACCAAGGAACTCA    | 264 | 59.17 | 61.19 | 33.33 | 60    |
|                                                  | LOC107770253 | TGTGTGAAACAAGGAGAAGACCAAG  | TCCAGCATCTCTTACCTCCAAT  | 218 | 61.38 | 58.61 | 44    | 45.45 |
| DEGs involved in isoprenoid biosynthetic process | LOC107831250 | GACAGATTGGTGGAGGGCTT       | TGCTGTGAGGAGTACAGACATC  | 105 | 59.67 | 59.51 | 55    | 50    |
|                                                  | LOC107769393 | TG TTCAGTTCTCTGCACCAAGA    | AAGCAAGATAAAGAGCTAGGGTT | 75  | 59.83 | 57.56 | 45.45 | 39.13 |
|                                                  | LOC107800233 | CGTGAAAATAAGTCCAGCG        | CCTGAGAAGCCTGAAGCACA    | 70  | 57.14 | 59.96 | 50    | 55    |
|                                                  | LOC107798542 | GAGGTGGTGAAGAGCACAT        | CCATCTCGTCAAGACTGCCA    | 194 | 59.67 | 59.75 | 55    | 55    |
|                                                  | LOC107779444 | AGGTGAGGCCAATTGCTAGTC      | CGAGCTAGGCACGAAAAGGTA   | 125 | 60.07 | 60.14 | 52.38 | 52.38 |
|                                                  | LOC107779472 | CGGCCTATTCACTTTCGTCC       | TTACAAGTATGCCAGACCACCA  | 54  | 58.71 | 59.36 | 55    | 45.45 |
